# Supplementary material
Source: Research Square preprint supplement (doi:10.21203/rs.3.rs-8418175/v1)
Supplement: Supplementary file 1 [file 919e6212d8a48aff9f2719f8.docx]

**Supplemental material**

Table Supplementary 1. Chemotherapy Regimen Categories in Patients with AL and LCDD

| Chemotherapy Regimen Categories | AL  n=480, cases (%) | LCDD  n=61, cases (%) |
| --- | --- | --- |
| Proteasome inhibitor-based | 187/282 (66.3) | 31/47 (66.0) |
| IMiDs-based | 29/282 (10.3) | 2/47 (4.3) |
| Dara-based | 58/282 (20.6) | 14/47 (29.8) |
| Conventional chemotherapy drug-based | 8/282 (2.8) | 0/47 (0) |

IMiDs, Immunomodulatory Drugs; Dara, Daratumumab

Table Supplementary 2. Hematologic Response Assessment by Chemotherapy Regimens in Patients with AL and LCDD

| Response Assessment |  | Proteasome inhibitor-based, cases (%) | ImiDs-based,  cases (%) | Dara-based,  cases (%) | Conventional chemotherapy drug-based, cases (%) |
| --- | --- | --- | --- | --- | --- |
| ≥ VGPR | AL | 61/96 (63.5) | 9/11 (81.8) | 29/35 (82.9) | 0/2 (0) |
| LCDD | 21/27 (77.8) | 0 | 8/11 (72.7) | 0 |
|  |  |  |  |  |  |
| ≥ PR | AL | 74/96 (77.1) | 10/11 (90.9) | 32/35 (91.4) | 0/2 (0) |
| LCDD | 25/27 (92.6) | 0 | 11/11 (100.0) | 0 |
|  |  |  |  |  |  |
| ≤ NR | AL | 22/96 (22.9) | 1/11 (9.1) | 3/35 (8.6) | 2/2 (100.0) |
| LCDD | 2/27 (7.4) | 0 | 0/11 | 0 |

NR, No Response; VGPR, Very Good Partial Response; IMiDs, Immunomodulatory Drugs; Dara, Daratumumab
